# Supplementary material for: Cyclin Y Is Expressed in Platelets and Modulates Integrin Outside-in Signaling
Source: MDPI journal article supplement (doi:10.3390/ijms21218239), 2020-11-03
Supplement: s1 [file s1]

Supplementary table 2: Blood counts in wild-type and *Ccny*<sup>-/-</sup> mice

| <b>Parameter</b>                  | <b>Wild-Type</b> | <b><i>Ccny</i><sup>-/-</sup></b> | <b>P values</b> |
|-----------------------------------|------------------|----------------------------------|-----------------|
| WBCs (10 <sup>9</sup> /L)         | 6.6 ± 0.8        | 7.05 ± 0.4                       | n.s             |
| Lymphocytes (10 <sup>9</sup> /L)  | 5.1 ± 0.9        | 5.9 ± 0.4                        | n.s             |
| Monocytes (10 <sup>9</sup> /L)    | 0.2 ± 0.1        | 0.2 ± 0                          | n.s             |
| Neutrophils (10 <sup>9</sup> /L)  | 1.2 ± 0.5        | 0.8 ± 0.2                        | n.s             |
| Erythrocytes (10 <sup>9</sup> /L) | 10.5 ± 0.1       | 10 ± 0.3                         | n.s             |
| Hemoglobin (g/dL)                 | 16 ± 0.3         | 16.5 ± 0.3                       | n.s             |
| Platelets (10 <sup>6</sup> /L)    | 649 ± 19.7       | 484.6 ± 42.4                     | 0.0034          |
| MPV                               | 6.3 ± 0.1        | 6.7 ± 0                          | 0.0024          |
