# Supplementary material for: Cyclin Y Is Expressed in Platelets and Modulates Integrin Outside-in Signaling
Source: MDPI journal article supplement (doi:10.3390/ijms21218239), 2020-11-03
Supplement: s1 [file s1]

## Supplementary Figures

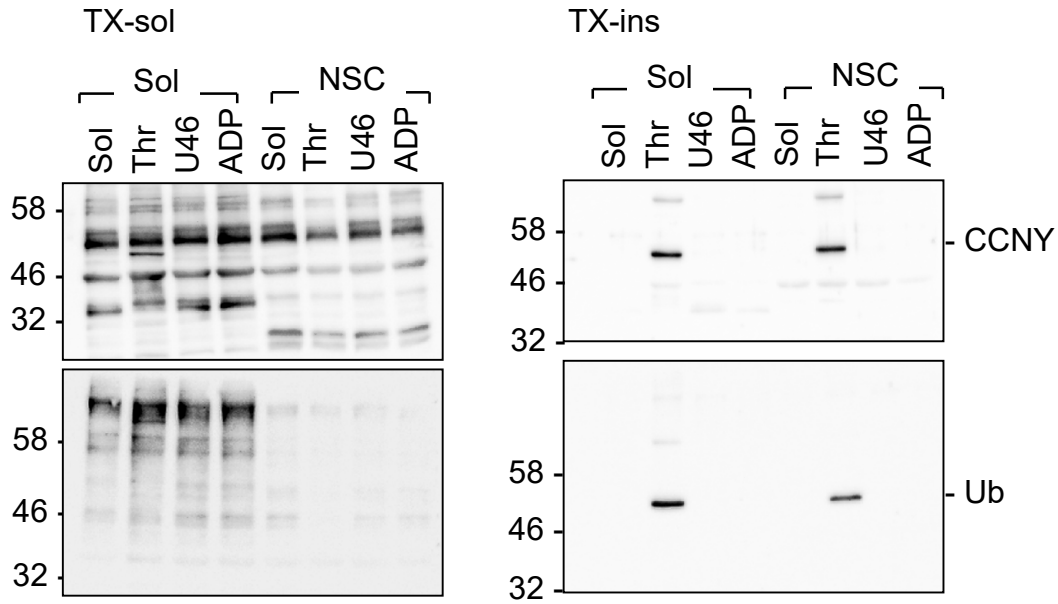

**Figure I:** Representative blot showing the levels of CCNY and ubiquitin in triton soluble vs triton insoluble fraction in resting platelets and after stimulation with thrombin (Thr, 1U/ml, 10 minutes), the thromboxane A2 analogue U46619 (U46, 100 nmol/L, 10 minutes) or ADP (1  $\mu$ mol/L, 10 minutes).

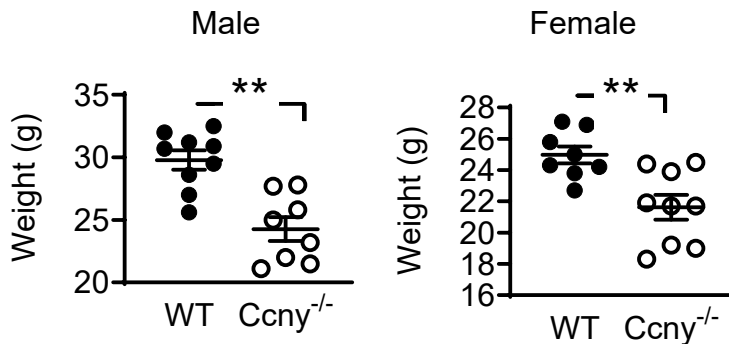

**Figure II:** Body weight of wild-type and Ccny<sup>-/-</sup> male (left panel) and female (right panel) mice; n=4-9 (Unpaired *t* test), \*\*\*P<0.005.
